# Supplementary material for: Highly efficient antibody purification with controlled orientation of protein A on magnetic nanoparticles
Source: Royal Society of Chemistry journal article supplement (doi:10.1039/c7md00468k), 2017-11-02
Supplement: c7md00468k1.pdf [file c7md00468k1.pdf]

## Supporting Information

### Highly efficient antibody purification with controlled orientation of protein A on magnetic nanoparticles

Sunghyun Kim, Daekyung Sung, and Jeong Ho Chang\*

Center for Convergence Bioceramic Materials, Korea Institute of Ceramic Engineering and Technology, Chungbuk 28160, Republic of Korea

\* Corresponding author. Tel:+82 43 913 1501.

*E-mail:* jhchang@kicet.re.kr (J. H. Chang)

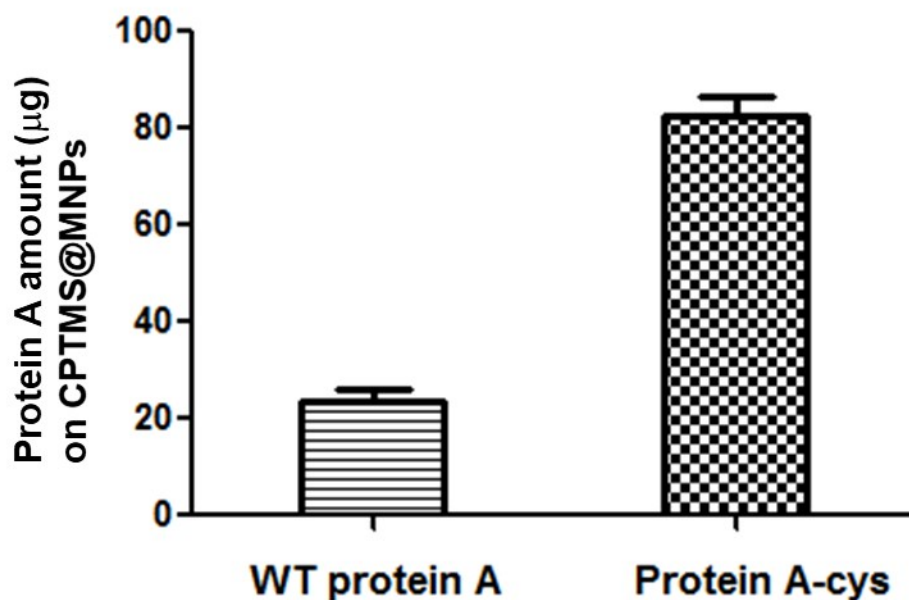

**Figure S1.** The immobilization amount of wild-type protein A (WT protein A) and genetically modified protein A (protein A-cys) on CPTMS@MNPs

1

(a)

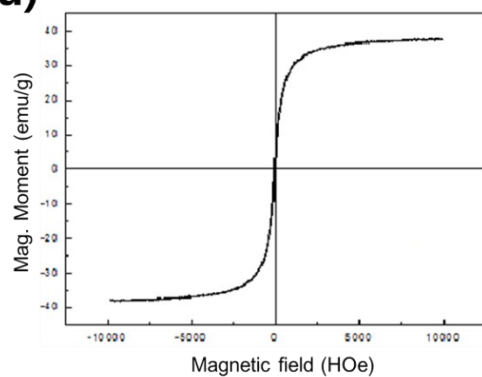

(b)

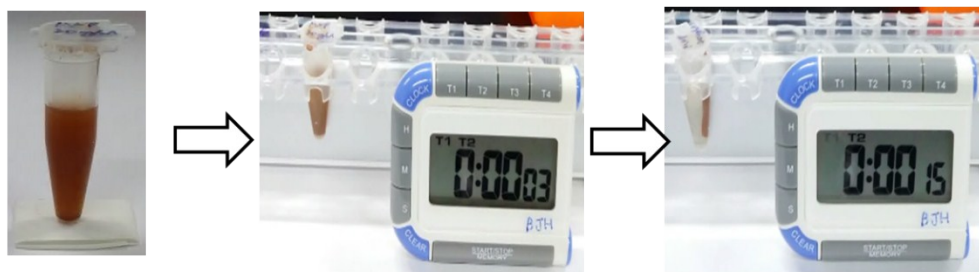

2 **Figure S2.** (a) Vibrating sample magnetometer(VSM) data (b) Fast magnetic separation
